# Supplementary material
Source: PubMed Central journal article supplement (PMC7493053)
Supplement: NIHMS1624255-supplement-1.pdf [file NIHMS1624255-supplement-1.pdf]

**Supplemental Table 1.** SET Regression Estimates.

| <b>Variable</b>                     | <b>Entire Population</b> | <b>HFrEF Population</b> | <b>HFpEF Population</b> | <b>Patients Without Cardiovascular Disease</b> |
|-------------------------------------|--------------------------|-------------------------|-------------------------|------------------------------------------------|
| Intercept <sup>a</sup>              | 298.6<br>(294.7,302.5)   | 304.8<br>(291.6,318)    | 296<br>(290.7,301.3)    | 288.2<br>(266.3,310.1)                         |
| Age (per 16.5 years)                | 2.6 (0,5.2)              | 2.58 (-5.0,10.1)        | 3.78 (0,7.6)            | 2.09 (-6.2,10.4)                               |
| Female vs. Male Sex                 | 9.6 (4.8,14.4)           | 0.7 (-10.2,11.5)        | 12.9 (6.6,19.3)         | 8.9 (-2.7,20.5)                                |
| Black vs. Non-black Race            | -5.0 (-9.6,-0.4)         | -14.4 (-24.5,-4.3)      | -2.2 (-8.2,3.8)         | -5.1 (-14.7,4.5)                               |
| E/e' >15 vs. E/e' ≤15               | 3.4 (-1.7,8.5)           | 3.6 (-6.5,13.6)         | 4.3 (-2.1,10.7)         | N/A                                            |
| Systolic BP (per 22 mmHg)           | 4.5 (2.2,6.8)            | 3.5 (-1.1,8.2)          | 5.2 (2.2,8.1)           | -1.5 (-11.8,8.9)                               |
| Ejection Fraction (per 13 %)        | 2.9 (-0.8,6.6)           | 2.0 (-8.1,12.2)         | 2.6 (-4.0,9.2)          | 2.4 (-9.3,14.1)                                |
| Diastolic Filling Time (per 144 ms) | -19.5 (-25.0,-14.0)      | -27.5 (-39.3,-15.7)     | -17.5 (-25.2,-9.8)      | -5.5 (-18.2,7.1)                               |

|                                  |                         |                         |                         |                         |
|----------------------------------|-------------------------|-------------------------|-------------------------|-------------------------|
| QRS Duration<br>(per 24 ms)      | 0.6 (-2.1,3.2)          | 0.5 (-4.7,5.6)          | 0.6 (-2.8,3.9)          | -1.7 (-15.7,12.3)       |
| Heart Rate (per<br>14 beats/min) | -46.3 (-52.1,-<br>40.5) | -48.2 (-59.2,-<br>37.3) | -45.9 (-54.3,-<br>37.5) | -30.2 (-46.0,-<br>14.4) |
| LVEDD (per<br>1.2 cm)            | 1.1 (-2.4,4.6)          | -2.7 (-9.4,3.8)         | 4.1 (-0.7,8.8)          | -4.6 (-18.0,8.9)        |
| PEP (per 27<br>ms)               | -17.0 (-19.8,-<br>14.1) | -17.6 (-22.9,-<br>12.4) | -14.9 (-18.9,-<br>10.9) | -18.5 (-28.1,-<br>8.9)  |

---

Coefficient estimates (95% CI) are reported from a multivariable linear model with SET as the outcome variable. Continuous variables were standardized by the overall standard deviation (SD), so the coefficient estimates the expected change in SET in milliseconds that would correspond to a 1 SD increase in the continuous variable, as indicated in the first column. For categorical variables the coefficient estimates the expected change in SET corresponding to the indicated comparison. Estimates for which the 95% CI does not cross zero are highlighted in bold font. N/A indicates that estimate is not available because no cases were present.

<sup>a</sup>. The intercept estimates the expected SET for a white male patient with E/e' ≤ 15 and mean value of the other variables.

**Supplemental Table 2.** Sensitivity Analysis Exploring Unadjusted and Adjusted Odds Ratios for 1-year Outcomes.

|                                                                                                                                                                                      | Heart Failure Mid-Range EF<br>(n=116) |         |                         |         | Heart Failure Preserved EF<br>(n=258) |         |                         |         |
|--------------------------------------------------------------------------------------------------------------------------------------------------------------------------------------|---------------------------------------|---------|-------------------------|---------|---------------------------------------|---------|-------------------------|---------|
|                                                                                                                                                                                      | Unadjusted                            |         | Adjusted*               |         | Unadjusted                            |         | Adjusted*               |         |
|                                                                                                                                                                                      | Odds Ratio<br>(95% CI)                | p-value | Odds Ratio<br>(95% CI)  | p-value | Odds Ratio<br>(95% CI)                | p-value | Odds Ratio<br>(95% CI)  | p-value |
| 1 Year All Cause Hospitalization<br>(HFmrEF n=30; HFpEF n=100)                                                                                                                       | 0.997<br>(0.891,1.115)                | 0.954   | 1.019<br>(0.815, 1.274) | 0.870   | 0.995<br>(0.934,1.059)                | 0.865   | 0.983<br>(0.887, 1.089) | 0.738   |
| 1 Year HF Hospitalization<br>(HFmrEF n=8; HFpEF n=14)                                                                                                                                | 1.071<br>(0.878,1.307)                | 0.496   | NA*                     | NA      | 0.923<br>(0.805,1.057)                | 0.245   | 1.14<br>(0.87,1.493)    | 0.342   |
| 1 Year Death<br>(HFmrEF n=6; HFpEF n=20)                                                                                                                                             | 1.041<br>(0.831,1.304)                | 0.725   | NA*                     | NA      | 0.915<br>(0.815,1.027)                | 0.133   | 0.928<br>(0.774, 1.112) | 0.417   |
| 1 Year Death/HF Hospitalization<br>(HFmrEF n=14; HFpEF n=30)                                                                                                                         | 1.062<br>(0.91,1.239)                 | 0.443   | 0.956<br>(0.643, 1.42)  | 0.822   | 0.925<br>(0.84,1.019)                 | 0.115   | 1.001<br>(0.854, 1.172) | 0.993   |
| The n in the first column indicates number of patients with outcome event. *Adjustment variables: Age, sex, race, BMI, Ejection Fraction, Heart Rate, Creatinine, BUN, Sodium, Pulse |                                       |         |                         |         |                                       |         |                         |         |

Pressure, Beta Blocker Use, ACE-I Use, E/e'
